# Supplementary material
Source: PubMed Central journal article supplement (PMC7790096)
Supplement: tpmd200416.SD1.pdf [file tpmd200416.SD1.pdf]

**Supplemental Table 1.** Correlation of variation for each independent variable included in a final model. Final models, denoted by scale as “C”, “L”, and “U”, denote “County”, “Local”, and “UFS”, respectively.

| Independent Variable | Scale | yr      | templag2 | templag3 | templag4 | Jantemp | mirlag1 | mirlag2 | mirlag3 | mirlag4 | totpop  | owpct   | dlipect | dfpct  | glandpct | hpctpos90 | asianpct | dhipct | mfpcct | wwpct   | precilag1 | precilag2 | precilag4 | Vllag1 |  |
|----------------------|-------|---------|----------|----------|----------|---------|---------|---------|---------|---------|---------|---------|---------|--------|----------|-----------|----------|--------|--------|---------|-----------|-----------|-----------|--------|--|
| yr                   | C     | 1       |          |          |          |         |         |         |         |         |         |         |         |        |          |           |          |        |        |         |           |           |           |        |  |
| templag2             | C     | 0.0024  | 1        |          |          |         |         |         |         |         |         |         |         |        |          |           |          |        |        |         |           |           |           |        |  |
|                      | C     | -0.0017 | 0.7701   | 1        |          |         |         |         |         |         |         |         |         |        |          |           |          |        |        |         |           |           |           |        |  |
| templag3             | L     |         |          | 1        |          |         |         |         |         |         |         |         |         |        |          |           |          |        |        |         |           |           |           |        |  |
|                      | U     |         |          | 1        |          |         |         |         |         |         |         |         |         |        |          |           |          |        |        |         |           |           |           |        |  |
| templag4             | C     | -0.0014 | 0.6402   | 0.7416   | 1        |         |         |         |         |         |         |         |         |        |          |           |          |        |        |         |           |           |           |        |  |
|                      | L     |         |          | 0.8444   | 1        |         |         |         |         |         |         |         |         |        |          |           |          |        |        |         |           |           |           |        |  |
|                      | U     |         |          | 0.8421   | 1        |         |         |         |         |         |         |         |         |        |          |           |          |        |        |         |           |           |           |        |  |
| Jantemp              | C     | -0.3932 | 0.0933   | 0.1038   | 0.1082   | 1       |         |         |         |         |         |         |         |        |          |           |          |        |        |         |           |           |           |        |  |
|                      | L     |         |          | 0.0785   | 0.0779   | 1       |         |         |         |         |         |         |         |        |          |           |          |        |        |         |           |           |           |        |  |
| mirlag1              | C     | -0.0153 | 0.1668   | 0.2053   | 0.2281   | 0.0962  | 1       |         |         |         |         |         |         |        |          |           |          |        |        |         |           |           |           |        |  |
| mirlag2              | C     | -0.0124 | 0.1333   | 0.1784   | 0.2126   | 0.1005  | 0.1707  | 1       |         |         |         |         |         |        |          |           |          |        |        |         |           |           |           |        |  |
| mirlag3              | C     | -0.0271 | 0.0815   | 0.1292   | 0.1857   | 0.1087  | 0.1433  | 0.1753  | 1       |         |         |         |         |        |          |           |          |        |        |         |           |           |           |        |  |
| mirlag4              | C     | -0.0314 | 0.0417   | 0.091    | 0.151    | 0.1144  | 0.1359  | 0.1525  | 0.1747  | 1       |         |         |         |        |          |           |          |        |        |         |           |           |           |        |  |
|                      | L     |         |          | 0.2739   | 0.3131   | 0.2039  |         |         |         | 1       |         |         |         |        |          |           |          |        |        |         |           |           |           |        |  |
| totpop               | C     | 0       | 0.0351   | 0.0352   | 0.0337   | 0.0953  | 0.0237  | 0.0295  | 0.0272  | 0.0265  | 1       |         |         |        |          |           |          |        |        |         |           |           |           |        |  |
|                      | L     |         |          | 0.0194   | 0.017    | 0.0564  |         |         |         | 0.0417  | 1       |         |         |        |          |           |          |        |        |         |           |           |           |        |  |
| owpct                | C     | -0.0006 | -0.0047  | -0.0057  | -0.0061  | 0.0119  | -0.0047 | -0.0048 | -0.0043 | -0.0041 | -0.1251 | 1       |         |        |          |           |          |        |        |         |           |           |           |        |  |
|                      | C     | -0.0028 | -0.0141  | -0.0145  | -0.014   | -0.0347 | 0.0001  | -0.0028 | -0.0015 | -0.0013 | -0.1042 | -0.1927 | 1       |        |          |           |          |        |        |         |           |           |           |        |  |
| dlipect              | L     |         |          | 0.0096   | 0.0082   | 0.0312  |         |         |         | 0.025   | 0.4853  |         | 1       |        |          |           |          |        |        |         |           |           |           |        |  |
| dfpct                | C     | 0.0039  | -0.0211  | -0.0218  | -0.0213  | -0.0478 | -0.019  | -0.0209 | -0.0191 | -0.0186 | -0.2757 | 0.0528  | -0.3254 | 1      |          |           |          |        |        |         |           |           |           |        |  |
| glandpct             | C     | -0.0114 | -0.0179  | -0.0184  | -0.018   | -0.0379 | -0.0144 | -0.0162 | -0.0144 | -0.0141 | -0.188  | 0.0498  | -0.2271 | 0.2659 | 1        |           |          |        |        |         |           |           |           |        |  |
| hpctpos90            | C     | 0       | -0.0308  | -0.0314  | -0.0305  | -0.0736 | -0.0309 | -0.0339 | -0.0309 | -0.0305 | -0.3075 | 0.0305  | -0.1531 | 0.2036 | 0.2844   | 1         |          |        |        |         |           |           |           |        |  |
| asianpct             | U     |         |          |          |          |         |         |         |         |         |         |         |         |        |          | 1         |          |        |        |         |           |           |           |        |  |
| dhipct               | U     |         |          |          |          |         |         |         |         |         |         |         |         |        |          | 0.1411    | 1        |        |        |         |           |           |           |        |  |
| mfpcct               | U     |         |          |          |          |         |         |         |         |         |         |         |         |        |          | -0.1988   | -0.2161  | 1      |        |         |           |           |           |        |  |
| wwpct                | U     |         |          |          |          |         |         |         |         |         |         |         |         |        |          | -0.2279   | -0.2371  | 0.8923 | 1      |         |           |           |           |        |  |
| precilag1            | U     |         |          |          |          |         |         |         |         |         |         |         |         |        |          | 0         | -0.0025  | 0.0048 | 0.0039 | 1       |           |           |           |        |  |
| precilag2            | U     |         |          |          |          |         |         |         |         |         |         |         |         |        |          | -0.0004   | -0.0036  | 0.0051 | 0.0038 | 0.0496  | 1         |           |           |        |  |
| precilag4            | U     |         |          |          |          |         |         |         |         |         |         |         |         |        |          | 0.0019    | -0.001   | 0.0041 | 0.005  | -0.1068 | -0.0383   | 1         |           |        |  |
| Vllag1               | U     |         |          |          |          |         |         |         |         |         |         |         |         |        |          | -0.0133   | 0.0033   | 0.0076 | 0.0187 | -0.0481 | -0.0388   | -0.0585   | 1         |        |  |
