# Supplementary material
Source: PubMed Central journal article supplement (PMC7790096)

A.

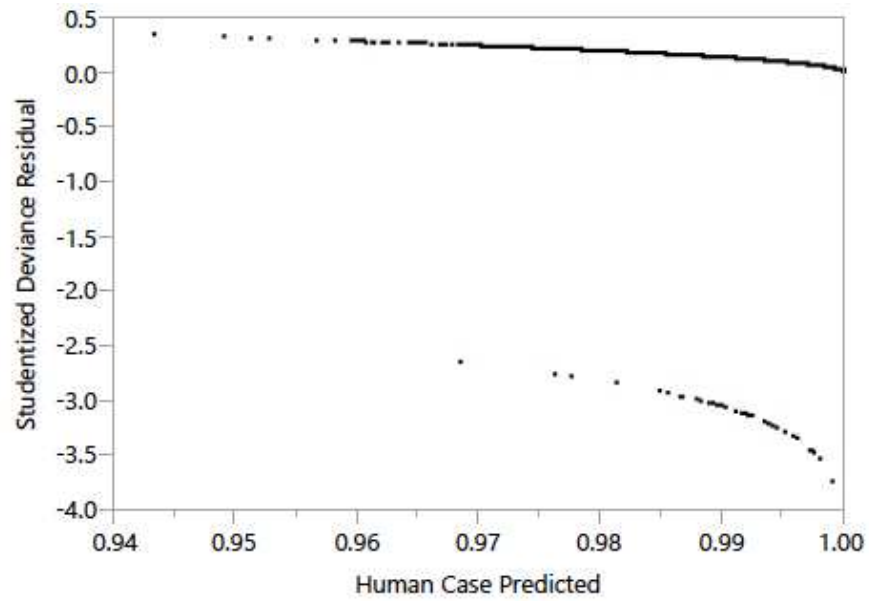

B.

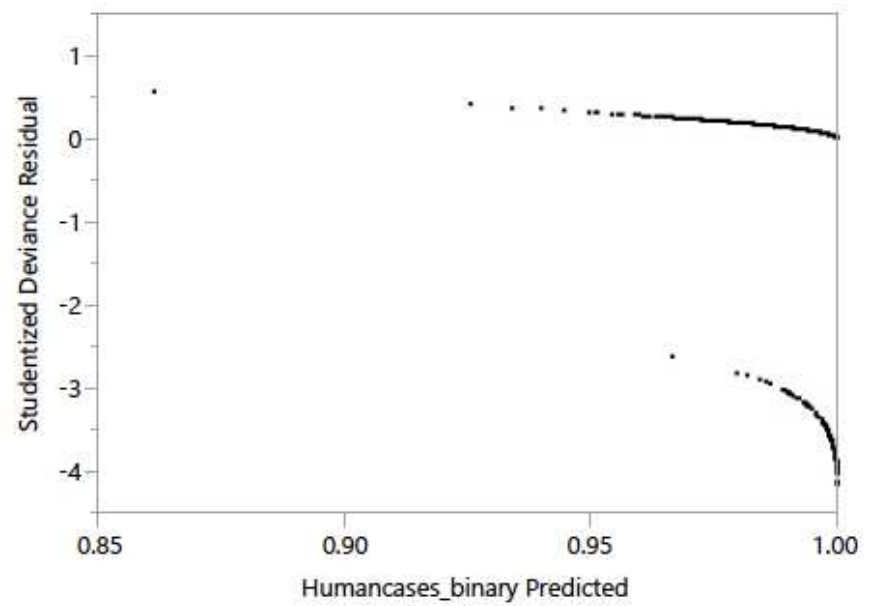

C.

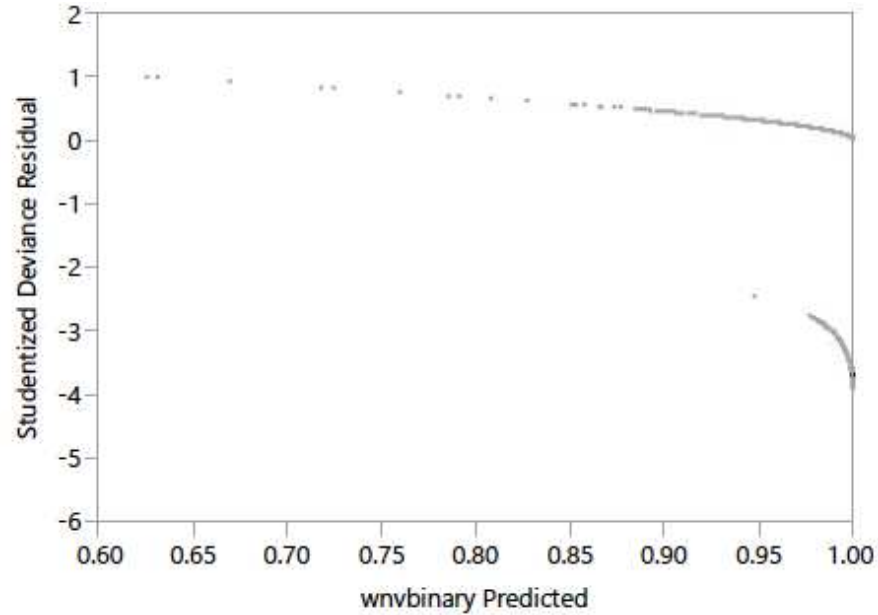

Supplement: tpmd200416.SD3.pdf [file tpmd200416.SD3.pdf]
